# Supplementary material for: Design, synthesis and evaluation of a novel glutamine derivative (2S,4R)-2-amino-4-cyano-4-[18F]fluorobutanoic acid
Source: Royal Society of Chemistry journal article supplement (doi:10.1039/d0nj00410c), 2020-01-01
Supplement: d0nj00410c1.pdf [file d0nj00410c1.pdf]

## Design, Synthesis and Evaluation of A Novel Glutamine

### Derivative (2*S*,4*R*)-2-amino-4-cyano-4-[<sup>18</sup>F]fluoro-butanoic acid

Song Liu<sup>a,†</sup>, Renbo Wu<sup>a,†</sup>, Yuli Sun<sup>a</sup>, Karl Ploessl<sup>c</sup>, Yan Zhang<sup>b</sup>, Yajing Liu<sup>d</sup>, Zehui Wu<sup>a,c,\*</sup>, Lin Zhu<sup>b</sup>, Hank F. Kung<sup>a,c\*</sup>

<sup>a</sup>Beijing Institute of Brain Disorders, Laboratory of Brain Disorders, Ministry of Science and Technology, Collaborative Innovation Center for Brain Disorders, Capital Medical University, Beijing, 100069, China;

<sup>b</sup>College of Chemistry, Beijing Normal University, Beijing, 100875, China;

<sup>c</sup>Department of Radiology, University of Pennsylvania, Philadelphia, 19104, United States;

<sup>d</sup>School of Pharmaceutical Science, Capital Medical University, Beijing 100069, China.

<sup>e</sup>Beijing Advanced Innovation Center for Big Data-based Precision Medicine, Beihang University, Beijing 100191, China

Corresponding author E-mail: wzhuey2012@ccmu.edu.cn (Z., Wu),  
kunghf@sunmac.spect.upenn.edu (H. F., Kung)

|                                                                                                        |    |
|--------------------------------------------------------------------------------------------------------|----|
| 1. In vitro stability (2 <i>S</i> ,4 <i>R</i> )-4-[ <sup>18</sup> F]FGln and [ <sup>18</sup> F]1 ..... | 2  |
| 2. X-ray Structure Determination of radiolabeling precursor 4 .....                                    | 2  |
| 3. X-ray Structure Determination of Intermediate 7 .....                                               | 10 |
| 4. Reference.....                                                                                      | 17 |

## 1. In vitro stability (2*S*,4*R*)-[<sup>18</sup>F]FGln and [<sup>18</sup>F]1

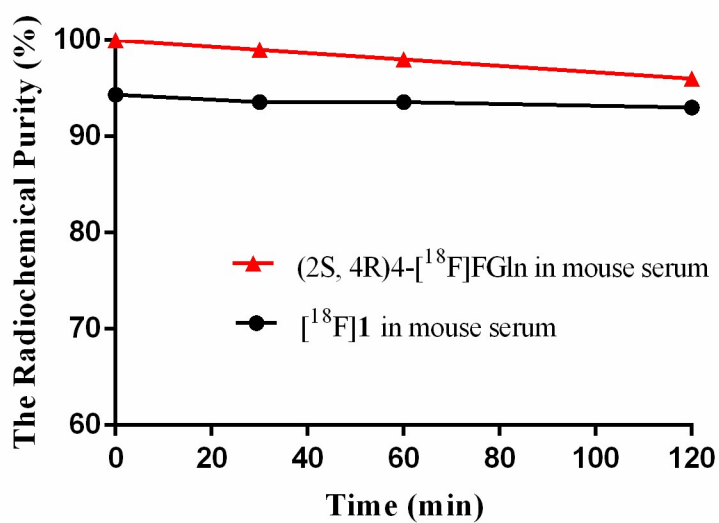

Figure S1. In vitro stability of (2*S*,4*R*)-[<sup>18</sup>F]FGln and [<sup>18</sup>F]1 in mouse serum buffers.

## 2. X-ray Structure Determination of radiolabeling precursor 4

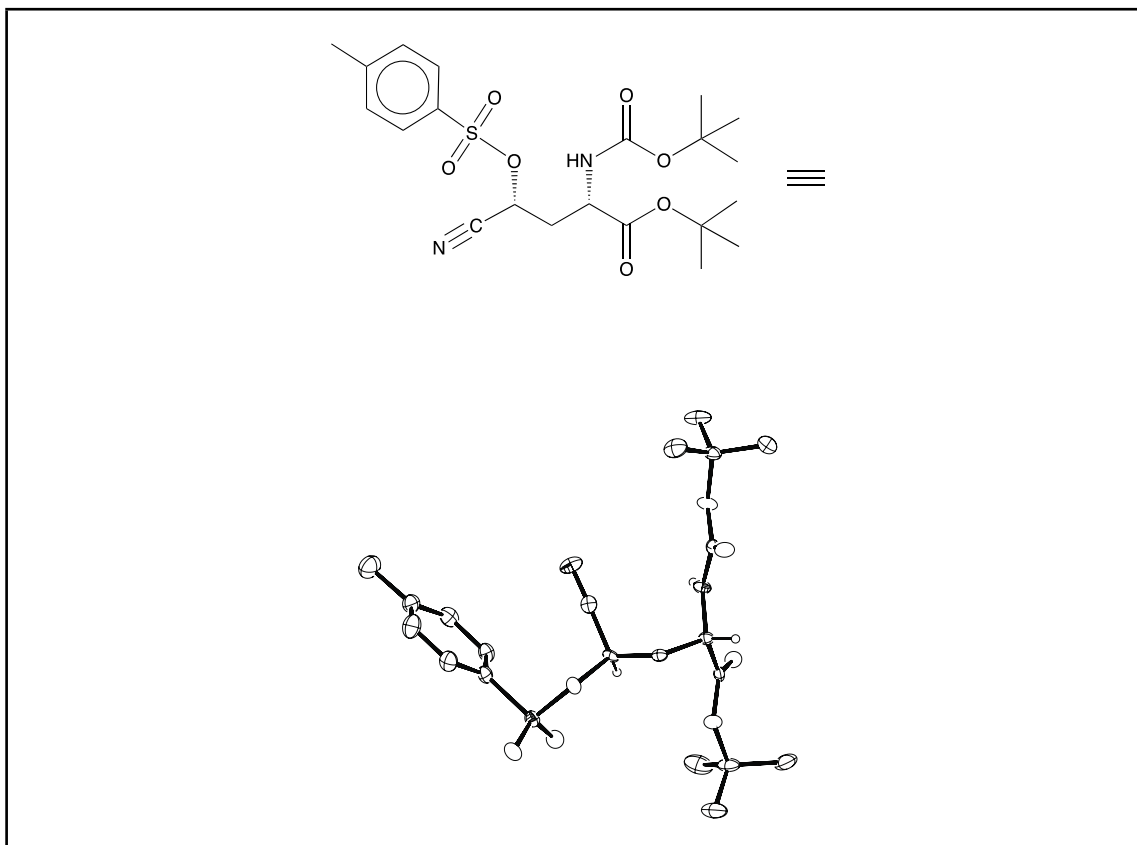

Compound **4**, C<sub>21</sub>H<sub>30</sub>N<sub>2</sub>O<sub>7</sub>S, crystallizes in the orthorhombic space group P2<sub>1</sub>2<sub>1</sub>2<sub>1</sub> (systematic absences h00: h=odd, 0k0: k=odd, and 00l: l=odd) with a=5.9695(2)Å, b=10.9627(3)Å, c=36.0572(11)Å, V=2359.65(12)Å<sup>3</sup>, Z=4, and d<sub>calc</sub>=1.279 g/cm<sup>3</sup>. X-ray intensity data were collected on a Bruker APEXII CCD area detector employing graphite-monochromated Mo-K $\alpha$  radiation ( $\lambda$ =0.71073 Å) at a temperature of 100(1)K. Preliminary indexing was performed from a series of thirty-six 0.5° rotation frames with exposures of 10 seconds. A total of 2348 frames were collected with a crystal to detector distance of 37.6 mm, rotation widths of 0.5° and exposures of 20 seconds:

| scan type | 2 $\theta$ | $\omega$ | $\phi$ | $\chi$ | frames |
|-----------|------------|----------|--------|--------|--------|
| $\phi$    | -23.00     | 346.20   | 14.21  | 32.61  | 739    |
| $\omega$  | -23.00     | 320.59   | 91.38  | -46.47 | 265    |
| $\omega$  | 14.50      | 42.88    | 65.26  | -33.72 | 162    |
| $\omega$  | 24.50      | 278.77   | 12.44  | 23.24  | 271    |
| $\phi$    | -23.00     | 336.61   | 24.44  | 52.47  | 739    |
| $\phi$    | 24.50      | 68.72    | 341.49 | -42.87 | 60     |

Rotation frames were integrated using SAINT<sup>i</sup>, producing a listing of unaveraged F<sup>2</sup> and  $\sigma(F^2)$  values which were then passed to the SHELXTL<sup>ii</sup> program package for further processing and structure solution. A total of 33855 reflections were measured over the ranges  $1.13 \leq \theta \leq 25.42^\circ$ ,  $-7 \leq h \leq 7$ ,  $-13 \leq k \leq 13$ ,  $-39 \leq l \leq 43$  yielding 4341 unique reflections (Rint = 0.0455). The intensity data were corrected for Lorentz and polarization effects and for absorption using SADABS<sup>iii</sup> (minimum and maximum transmission 0.6775, 0.7452).

The structure was solved by direct methods (SHELXS-97<sup>iv</sup>). Refinement was by full-matrix least squares based on F<sup>2</sup> using SHELXL-97.<sup>v</sup> All reflections were used during refinement. The weighting scheme used was  $w=1/[\sigma^2(F_o^2) + (0.0314P)^2 + 1.2540P]$  where  $P = (F_o^2 + 2F_c^2)/3$ . Non-hydrogen atoms were refined anisotropically and hydrogen atoms were refined using a riding model. Refinement converged to R1=0.0391 and wR2=0.0868 for 4016 observed reflections for which  $F > 4\sigma(F)$  and R1=0.0445 and wR2=0.0890 and GOF = 1.185 for all 4341 unique, non-zero reflections and 288 variables.<sup>vi</sup> The maximum  $\Delta/\sigma$  in the final cycle of least squares was 0.000 and the two most prominent peaks in the final difference Fourier were +0.229 and -0.289 e/Å<sup>3</sup>.

Table S1. lists cell information, data collection parameters, and refinement data. Final positional and equivalent isotropic thermal parameters are given in Tables S2. and S3. Anisotropic thermal parameters are in Table S4. Tables S5. and S6. list bond distances and bond angles. Figure S1. is an ORTEP<sup>vii</sup> representation of the molecule with 50% probability thermal ellipsoids displayed.

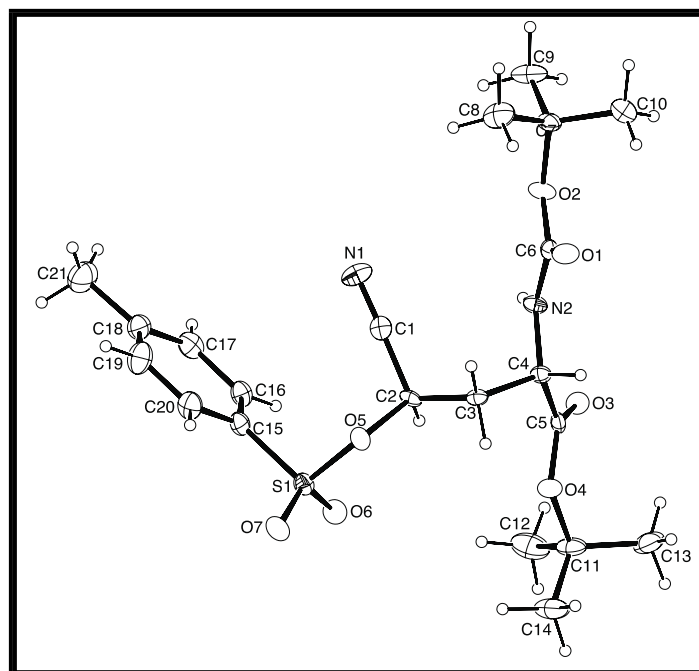

Figure S1. ORTEP drawing of the title compound with 50% probability thermal ellipsoids.

**Table S1. Summary of Structure Determination of Compound 4**

|                                   |                                                                 |
|-----------------------------------|-----------------------------------------------------------------|
| Empirical formula                 | C <sub>21</sub> H <sub>30</sub> N <sub>2</sub> O <sub>7</sub> S |
| Formula weight                    | 454.53                                                          |
| Temperature                       | 100(1) K                                                        |
| Wavelength                        | 0.71073 Å                                                       |
| Crystal system                    | orthorhombic                                                    |
| Space group                       | P2 <sub>1</sub> 2 <sub>1</sub> 2 <sub>1</sub>                   |
| Cell constants:                   |                                                                 |
| a                                 | 5.9695(2) Å                                                     |
| b                                 | 10.9627(3) Å                                                    |
| c                                 | 36.0572(11) Å                                                   |
| Volume                            | 2359.65(12) Å <sup>3</sup>                                      |
| Z                                 | 4                                                               |
| Density (calculated)              | 1.279 Mg/m <sup>3</sup>                                         |
| Absorption coefficient            | 0.180 mm <sup>-1</sup>                                          |
| F(000)                            | 968                                                             |
| Crystal size                      | 0.50 x 0.10 x 0.02 mm <sup>3</sup>                              |
| Theta range for data collection   | 1.13 to 25.42°                                                  |
| Index ranges                      | -7 ≤ h ≤ 7, -13 ≤ k ≤ 13, -39 ≤ l ≤ 43                          |
| Reflections collected             | 33855                                                           |
| Independent reflections           | 4341 [R(int) = 0.0455]                                          |
| Completeness to theta = 25.42°    | 99.6 %                                                          |
| Absorption correction             | Semi-empirical from equivalents                                 |
| Max. and min. transmission        | 0.7452 and 0.6775                                               |
| Refinement method                 | Full-matrix least-squares on F <sup>2</sup>                     |
| Data / restraints / parameters    | 4341 / 0 / 288                                                  |
| Goodness-of-fit on F <sup>2</sup> | 1.185                                                           |
| Final R indices [I > 2σ(I)]       | R1 = 0.0391, wR2 = 0.0868                                       |
| R indices (all data)              | R1 = 0.0445, wR2 = 0.0890                                       |
| Absolute structure parameter      | 0.07(8)                                                         |
| Largest diff. peak and hole       | 0.229 and -0.289 e.Å <sup>-3</sup>                              |

**Table S2. Refined Positional Parameters for Compound 4**

| Atom | x           | y           | z            | U <sub>eq</sub> , Å <sup>2</sup> |
|------|-------------|-------------|--------------|----------------------------------|
| C1   | 0.4172(4)   | 0.2571(2)   | 0.37396(6)   | 0.0176(5)                        |
| C2   | 0.3140(4)   | 0.3805(2)   | 0.37229(6)   | 0.0142(5)                        |
| C3   | 0.3161(4)   | 0.4349(2)   | 0.33351(7)   | 0.0140(5)                        |
| C4   | 0.5462(4)   | 0.4859(2)   | 0.32238(6)   | 0.0142(5)                        |
| C5   | 0.6241(4)   | 0.5909(2)   | 0.34658(6)   | 0.0143(5)                        |
| C6   | 0.7432(4)   | 0.3203(2)   | 0.29170(7)   | 0.0155(5)                        |
| C7   | 0.9762(4)   | 0.1491(2)   | 0.27034(6)   | 0.0192(5)                        |
| C8   | 0.7779(5)   | 0.0657(3)   | 0.26521(9)   | 0.0307(7)                        |
| C9   | 1.1640(5)   | 0.0829(3)   | 0.28987(8)   | 0.0305(7)                        |
| C10  | 1.0550(6)   | 0.2051(3)   | 0.23445(8)   | 0.0388(8)                        |
| C11  | 0.4827(5)   | 0.7820(2)   | 0.37319(7)   | 0.0247(6)                        |
| C12  | 0.5746(5)   | 0.7606(3)   | 0.41155(8)   | 0.0385(8)                        |
| C13  | 0.6264(5)   | 0.8622(2)   | 0.34895(9)   | 0.0371(8)                        |
| C14  | 0.2440(5)   | 0.8298(3)   | 0.37509(9)   | 0.0346(7)                        |
| C15  | 0.0723(4)   | 0.2417(2)   | 0.44504(7)   | 0.0186(5)                        |
| C16  | 0.2767(4)   | 0.2259(2)   | 0.46291(7)   | 0.0200(5)                        |
| C17  | 0.3242(4)   | 0.1121(3)   | 0.47786(7)   | 0.0236(6)                        |
| C18  | 0.1747(5)   | 0.0164(2)   | 0.47600(7)   | 0.0251(6)                        |
| C19  | -0.0281(5)  | 0.0360(3)   | 0.45750(8)   | 0.0303(7)                        |
| C20  | -0.0796(4)  | 0.1472(2)   | 0.44183(7)   | 0.0247(6)                        |
| C21  | 0.2234(5)   | -0.1048(3)  | 0.49386(8)   | 0.0381(7)                        |
| N1   | 0.4913(4)   | 0.16157(19) | 0.37542(6)   | 0.0281(5)                        |
| N2   | 0.7206(3)   | 0.39461(18) | 0.32135(5)   | 0.0161(4)                        |
| O1   | 0.6224(3)   | 0.32233(15) | 0.26491(5)   | 0.0208(4)                        |
| O2   | 0.9207(3)   | 0.24629(15) | 0.29720(5)   | 0.0188(4)                        |
| O3   | 0.8144(3)   | 0.60465(15) | 0.35662(5)   | 0.0190(4)                        |
| O4   | 0.4510(3)   | 0.66398(15) | 0.35400(5)   | 0.0184(4)                        |
| O5   | 0.0782(2)   | 0.36782(15) | 0.38274(4)   | 0.0165(4)                        |
| O6   | 0.1446(3)   | 0.47560(16) | 0.44149(5)   | 0.0231(4)                        |
| O7   | -0.2297(3)  | 0.39761(16) | 0.42310(5)   | 0.0235(4)                        |
| S1   | 0.00798(10) | 0.38350(5)  | 0.425200(15) | 0.01749(14)                      |

$$U_{eq} = 1/3[U_{11}(aa^*)^2 + U_{22}(bb^*)^2 + U_{33}(cc^*)^2 + 2U_{12}aa^*bb^*\cos\gamma + 2U_{13}aa^*cc^*\cos\beta + 2U_{23}bb^*cc^*\cos\alpha]$$

**Table S3. Positional Parameters for Hydrogens in Compound 4**

| Atom | x       | y       | z      | U <sub>iso</sub> , Å <sup>2</sup> |
|------|---------|---------|--------|-----------------------------------|
| H2   | 0.3903  | 0.4354  | 0.3896 | 0.019                             |
| H3a  | 0.2062  | 0.5000  | 0.3323 | 0.019                             |
| H3b  | 0.2723  | 0.3726  | 0.3158 | 0.019                             |
| H4   | 0.5311  | 0.5179  | 0.2971 | 0.019                             |
| H8a  | 0.7248  | 0.0392  | 0.2890 | 0.046                             |
| H8b  | 0.8220  | -0.0039 | 0.2508 | 0.046                             |
| H8c  | 0.6606  | 0.1087  | 0.2525 | 0.046                             |
| H9a  | 1.2885  | 0.1373  | 0.2931 | 0.046                             |
| H9b  | 1.2100  | 0.0142  | 0.2752 | 0.046                             |
| H9c  | 1.1129  | 0.0551  | 0.3137 | 0.046                             |
| H10a | 0.9355  | 0.2517  | 0.2236 | 0.058                             |
| H10b | 1.0994  | 0.1417  | 0.2176 | 0.058                             |
| H10c | 1.1803  | 0.2577  | 0.2392 | 0.058                             |
| H12a | 0.4866  | 0.6995  | 0.4238 | 0.058                             |
| H12b | 0.5686  | 0.8352  | 0.4255 | 0.058                             |
| H12c | 0.7271  | 0.7335  | 0.4098 | 0.058                             |
| H13a | 0.7751  | 0.8292  | 0.3477 | 0.056                             |
| H13b | 0.6320  | 0.9429  | 0.3593 | 0.056                             |
| H13c | 0.5635  | 0.8657  | 0.3245 | 0.056                             |
| H14a | 0.1834  | 0.8352  | 0.3505 | 0.052                             |
| H14b | 0.2437  | 0.9092  | 0.3863 | 0.052                             |
| H14c | 0.1542  | 0.7752  | 0.3896 | 0.052                             |
| H16  | 0.3787  | 0.2897  | 0.4648 | 0.027                             |
| H17  | 0.4613  | 0.1001  | 0.4895 | 0.031                             |
| H19  | -0.1308 | -0.0275 | 0.4557 | 0.040                             |
| H20  | -0.2143 | 0.1584  | 0.4293 | 0.033                             |
| H21a | 0.3819  | -0.1130 | 0.4976 | 0.057                             |
| H21b | 0.1715  | -0.1693 | 0.4780 | 0.057                             |
| H21c | 0.1480  | -0.1095 | 0.5173 | 0.057                             |
| H2a  | 0.8110  | 0.3875  | 0.3398 | 0.021                             |

**Table S4. Refined Thermal Parameters (U's) for Compound 4**

| Atom | U <sub>11</sub> | U <sub>22</sub> | U <sub>33</sub> | U <sub>23</sub> | U <sub>13</sub> | U <sub>12</sub> |
|------|-----------------|-----------------|-----------------|-----------------|-----------------|-----------------|
| C1   | 0.0166(12)      | 0.0197(13)      | 0.0164(12)      | -0.0014(10)     | -0.0030(10)     | -0.0042(11)     |
| C2   | 0.0063(10)      | 0.0185(12)      | 0.0177(12)      | -0.0030(10)     | 0.0014(9)       | 0.0024(11)      |
| C3   | 0.0112(12)      | 0.0126(11)      | 0.0181(13)      | -0.0027(10)     | -0.0012(10)     | 0.0016(10)      |
| C4   | 0.0109(12)      | 0.0147(11)      | 0.0169(12)      | -0.0007(9)      | -0.0007(9)      | 0.0022(10)      |
| C5   | 0.0118(12)      | 0.0163(13)      | 0.0147(12)      | 0.0041(9)       | 0.0032(9)       | -0.0022(10)     |
| C6   | 0.0159(13)      | 0.0133(11)      | 0.0173(13)      | 0.0002(10)      | 0.0035(10)      | -0.0032(10)     |
| C7   | 0.0188(13)      | 0.0165(12)      | 0.0222(13)      | -0.0077(9)      | 0.0034(11)      | -0.0005(11)     |
| C8   | 0.0238(15)      | 0.0234(14)      | 0.0451(18)      | -0.0071(13)     | -0.0045(13)     | -0.0029(12)     |
| C9   | 0.0243(15)      | 0.0249(15)      | 0.0424(18)      | -0.0151(13)     | -0.0055(12)     | 0.0089(12)      |
| C10  | 0.051(2)        | 0.0292(15)      | 0.0364(17)      | 0.0001(13)      | 0.0233(15)      | 0.0062(14)      |
| C11  | 0.0186(13)      | 0.0170(12)      | 0.0384(15)      | -0.0134(11)     | 0.0005(12)      | 0.0003(12)      |
| C12  | 0.0318(17)      | 0.0455(18)      | 0.0381(17)      | -0.0202(15)     | -0.0018(13)     | 0.0041(15)      |
| C13  | 0.0280(15)      | 0.0144(14)      | 0.069(2)        | -0.0017(13)     | 0.0103(15)      | 0.0018(12)      |
| C14  | 0.0202(15)      | 0.0252(15)      | 0.058(2)        | -0.0168(14)     | 0.0056(14)      | 0.0012(12)      |
| C15  | 0.0194(13)      | 0.0230(13)      | 0.0134(12)      | 0.0022(10)      | 0.0011(10)      | -0.0004(11)     |
| C16  | 0.0183(13)      | 0.0259(13)      | 0.0159(13)      | 0.0014(11)      | -0.0006(10)     | -0.0023(11)     |
| C17  | 0.0226(13)      | 0.0334(15)      | 0.0147(13)      | 0.0003(12)      | -0.0029(10)     | 0.0021(13)      |
| C18  | 0.0347(16)      | 0.0239(14)      | 0.0166(14)      | 0.0022(11)      | 0.0022(11)      | 0.0031(13)      |
| C19  | 0.0303(16)      | 0.0285(15)      | 0.0323(15)      | 0.0033(12)      | -0.0044(13)     | -0.0105(13)     |
| C20  | 0.0178(13)      | 0.0276(15)      | 0.0288(14)      | 0.0018(11)      | -0.0022(11)     | -0.0044(11)     |
| C21  | 0.0482(18)      | 0.0333(16)      | 0.0329(16)      | 0.0077(14)      | -0.0028(14)     | 0.0060(16)      |
| N1   | 0.0309(13)      | 0.0185(11)      | 0.0350(13)      | 0.0000(9)       | -0.0062(11)     | 0.0078(11)      |
| N2   | 0.0120(9)       | 0.0188(11)      | 0.0173(10)      | -0.0035(9)      | -0.0015(8)      | 0.0032(9)       |
| O1   | 0.0207(9)       | 0.0208(9)       | 0.0208(9)       | -0.0040(7)      | -0.0039(8)      | 0.0049(8)       |
| O2   | 0.0119(8)       | 0.0216(9)       | 0.0230(9)       | -0.0094(7)      | -0.0011(7)      | 0.0033(7)       |
| O3   | 0.0106(8)       | 0.0178(9)       | 0.0287(9)       | -0.0011(8)      | -0.0010(7)      | -0.0029(7)      |
| O4   | 0.0118(9)       | 0.0159(8)       | 0.0275(9)       | -0.0058(7)      | -0.0002(7)      | -0.0011(7)      |
| O5   | 0.0094(8)       | 0.0221(9)       | 0.0179(8)       | 0.0023(7)       | -0.0006(6)      | -0.0015(7)      |
| O6   | 0.0260(10)      | 0.0220(9)       | 0.0213(9)       | -0.0041(8)      | 0.0019(8)       | -0.0041(8)      |
| O7   | 0.0139(8)       | 0.0314(10)      | 0.0253(10)      | 0.0048(8)       | 0.0036(7)       | 0.0045(8)       |
| S1   | 0.0144(3)       | 0.0205(3)       | 0.0176(3)       | 0.0009(2)       | 0.0013(2)       | -0.0007(3)      |

The form of the anisotropic displacement parameter is:

$$\exp[-2\pi^2(a^2U_{11}h^2+b^2U_{22}k^2+c^2U_{33}l^2+2b^*c^*U_{23}kl+2a^*c^*U_{13}hl+2a^*b^*U_{12}hk)]$$



**Table S5. Bond Distances in Compound 4, Å**

|         |            |         |            |         |            |
|---------|------------|---------|------------|---------|------------|
| C1-N1   | 1.138(3)   | C1-C2   | 1.487(3)   | C2-O5   | 1.464(3)   |
| C2-C3   | 1.521(3)   | C3-C4   | 1.536(3)   | C4-N2   | 1.445(3)   |
| C4-C5   | 1.517(3)   | C5-O3   | 1.202(3)   | C5-O4   | 1.334(3)   |
| C6-O1   | 1.206(3)   | C6-O2   | 1.349(3)   | C6-N2   | 1.351(3)   |
| C7-O2   | 1.478(3)   | C7-C8   | 1.507(4)   | C7-C10  | 1.508(4)   |
| C7-C9   | 1.510(4)   | C11-O4  | 1.479(3)   | C11-C12 | 1.506(4)   |
| C11-C13 | 1.508(4)   | C11-C14 | 1.520(4)   | C15-C20 | 1.382(3)   |
| C15-C16 | 1.391(3)   | C15-S1  | 1.754(3)   | C16-C17 | 1.388(4)   |
| C17-C18 | 1.380(4)   | C18-C19 | 1.399(4)   | C18-C21 | 1.505(4)   |
| C19-C20 | 1.378(4)   | O5-S1   | 1.5965(16) | O6-S1   | 1.4248(18) |
| O7-S1   | 1.4291(17) |         |            |         |            |

**Table S6. Bond Angles in Compound 4, °**

|             |            |             |            |             |            |
|-------------|------------|-------------|------------|-------------|------------|
| N1-C1-C2    | 178.4(3)   | O5-C2-C1    | 107.57(19) | O5-C2-C3    | 106.37(17) |
| C1-C2-C3    | 113.01(19) | C2-C3-C4    | 112.97(19) | N2-C4-C5    | 108.63(18) |
| N2-C4-C3    | 113.52(18) | C5-C4-C3    | 113.57(19) | O3-C5-O4    | 126.6(2)   |
| O3-C5-C4    | 123.9(2)   | O4-C5-C4    | 109.49(19) | O1-C6-O2    | 126.8(2)   |
| O1-C6-N2    | 124.3(2)   | O2-C6-N2    | 108.9(2)   | O2-C7-C8    | 110.0(2)   |
| O2-C7-C10   | 109.78(19) | C8-C7-C10   | 112.8(2)   | O2-C7-C9    | 101.96(19) |
| C8-C7-C9    | 110.4(2)   | C10-C7-C9   | 111.4(2)   | O4-C11-C12  | 109.9(2)   |
| O4-C11-C13  | 108.2(2)   | C12-C11-C13 | 114.6(3)   | O4-C11-C14  | 101.7(2)   |
| C12-C11-C14 | 110.7(2)   | C13-C11-C14 | 111.0(2)   | C20-C15-C16 | 121.4(2)   |
| C20-C15-S1  | 119.13(19) | C16-C15-S1  | 119.46(19) | C17-C16-C15 | 118.1(2)   |
| C18-C17-C16 | 122.2(2)   | C17-C18-C19 | 117.8(2)   | C17-C18-C21 | 121.7(3)   |
| C19-C18-C21 | 120.5(3)   | C20-C19-C18 | 121.7(3)   | C19-C20-C15 | 118.8(2)   |
| C6-N2-C4    | 120.7(2)   | C6-O2-C7    | 120.88(18) | C5-O4-C11   | 121.34(18) |
| C2-O5-S1    | 119.29(14) | O6-S1-O7    | 120.90(11) | O6-S1-O5    | 108.74(10) |
| O7-S1-O5    | 102.80(10) | O6-S1-C15   | 109.54(11) | O7-S1-C15   | 109.57(11) |
| O5-S1-C15   | 103.78(10) |             |            |             |            |

### 3. X-ray Structure Determination of Intermediate 7

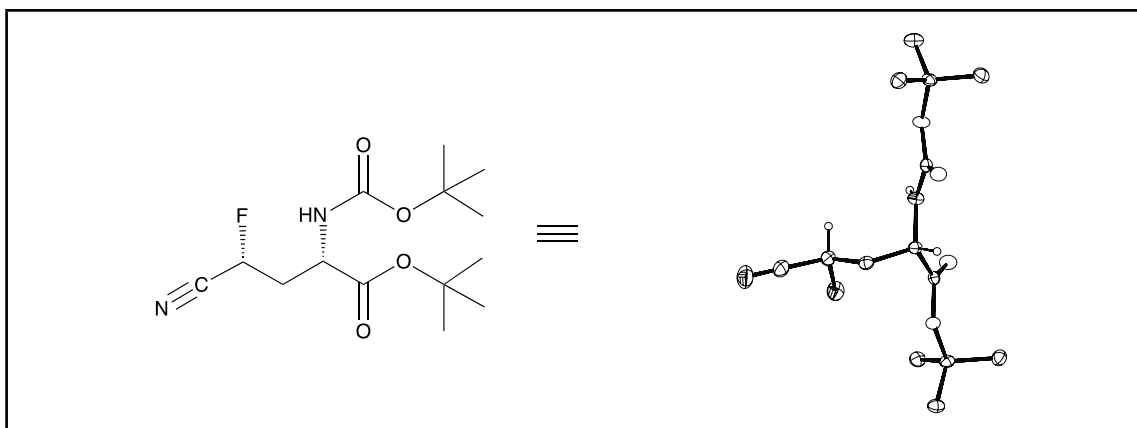

Compound **7**,  $C_{14}H_{23}N_2O_4F$ , crystallizes in the orthorhombic space group  $P2_12_12_1$  (systematic absences  $h00$ :  $h=\text{odd}$ ,  $0k0$ :  $k=\text{odd}$ , and  $00l$ :  $l=\text{odd}$ ) with  $a=5.33170(10)\text{\AA}$ ,  $b=10.0576(3)\text{\AA}$ ,  $c=30.0104(8)\text{\AA}$ ,  $V=1609.28(7)\text{\AA}^3$ ,  $Z=4$ , and  $d_{\text{calc}}=1.248\text{ g/cm}^3$ . X-ray intensity data were collected on a Bruker APEXII CCD area detector employing graphite-monochromated Mo- $K\alpha$  radiation ( $\lambda=0.71073\text{ \AA}$ ) at a temperature of  $100(1)\text{K}$ . Preliminary indexing was performed from a series of thirty-six  $0.5^\circ$  rotation frames with exposures of 10 seconds. A total of 4434 frames were collected with a crystal to detector distance of 44.8 mm, rotation widths of  $0.5^\circ$  and exposures of 15 seconds:

| scan type | $2\theta$ | $\omega$ | $\phi$ | $\chi$ | frames |
|-----------|-----------|----------|--------|--------|--------|
| $\phi$    | -28.00    | 340.03   | 328.61 | -63.64 | 739    |
| $\phi$    | 14.50     | 101.06   | 337.92 | -48.25 | 739    |
| $\omega$  | -28.00    | 220.69   | 190.55 | 45.39  | 245    |
| $\omega$  | -28.00    | 213.74   | 117.50 | 57.63  | 254    |
| $\phi$    | -28.00    | 327.36   | 13.34  | 30.75  | 415    |
| $\phi$    | -23.00    | 328.91   | 44.82  | -70.01 | 577    |
| $\phi$    | -18.00    | 99.81    | 333.80 | -58.65 | 726    |
| $\phi$    | 27.00     | 43.00    | 330.80 | -60.33 | 739    |

Rotation frames were integrated using SAINT<sup>viii</sup>, producing a listing of unaveraged  $F^2$  and  $\sigma(F^2)$  values which were then passed to the SHELXTL<sup>ix</sup> program package for further processing and structure solution. A total of 39657 reflections were measured over the ranges  $1.36 \leq \theta \leq 25.37^\circ$ ,  $-6 \leq h \leq 6$ ,  $-12 \leq k \leq 12$ ,  $-36 \leq l \leq 35$  yielding 2968 unique reflections (Rint

= 0.0293). The intensity data were corrected for Lorentz and polarization effects and for absorption using SADABS<sup>x</sup> (minimum and maximum transmission 0.7064, 0.7452).

The structure was solved by direct methods (SHELXS-97<sup>xi</sup>). Refinement was by full-matrix least squares based on  $F^2$  using SHELXL-97.<sup>xii</sup> All reflections were used during refinement. The weighting scheme used was  $w=1/[\sigma^2(F_o^2) + (0.0288P)^2 + 0.3182P]$  where  $P = (F_o^2 + 2F_c^2)/3$ . Non-hydrogen atoms were refined anisotropically and hydrogen atoms were refined using a riding model. Refinement converged to  $R1=0.0252$  and  $wR2=0.0595$  for 2797 observed reflections for which  $F > 4\sigma(F)$  and  $R1=0.0280$  and  $wR2=0.0607$  and  $GOF=1.093$  for all 2968 unique, non-zero reflections and 197 variables.<sup>xiii</sup> The maximum  $\Delta/\sigma$  in the final cycle of least squares was 0.000 and the two most prominent peaks in the final difference Fourier were +0.158 and -0.171 e/Å<sup>3</sup>.

Table 1. lists cell information, data collection parameters, and refinement data. Final positional and equivalent isotropic thermal parameters are given in Tables 2. and 3. Anisotropic thermal parameters are in Table 4. Tables 5. and 6. list bond distances and bond angles. Figure 1. is an ORTEP<sup>xiv</sup> representation of the molecule with 50% probability thermal ellipsoids displayed.

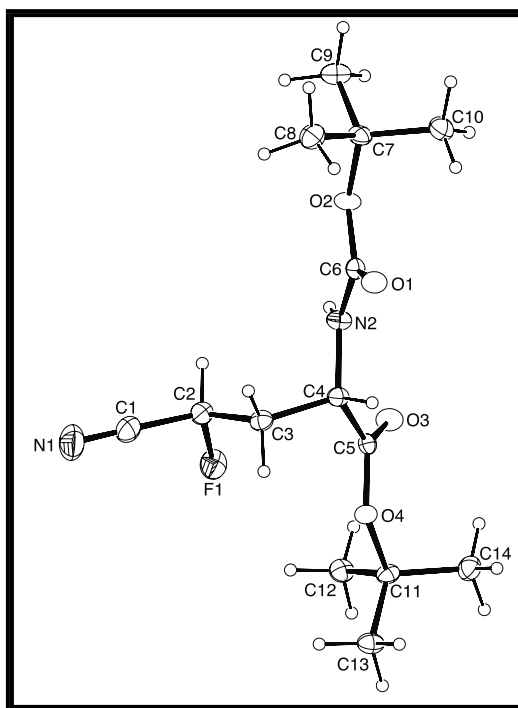

Figure 1. ORTEP drawing of the title compound with 50% probability thermal ellipsoids.

**Table 1. Summary of Structure Determination of Compound 7**

|                                   |                                                                 |
|-----------------------------------|-----------------------------------------------------------------|
| Empirical formula                 | C <sub>14</sub> H <sub>23</sub> N <sub>2</sub> O <sub>4</sub> F |
| Formula weight                    | 302.34                                                          |
| Temperature                       | 100(1) K                                                        |
| Wavelength                        | 0.71073 Å                                                       |
| Crystal system                    | orthorhombic                                                    |
| Space group                       | P2 <sub>1</sub> 2 <sub>1</sub> 2 <sub>1</sub>                   |
| Cell constants:                   |                                                                 |
| a                                 | 5.33170(10) Å                                                   |
| b                                 | 10.0576(3) Å                                                    |
| c                                 | 30.0104(8) Å                                                    |
| Volume                            | 1609.28(7) Å <sup>3</sup>                                       |
| Z                                 | 4                                                               |
| Density (calculated)              | 1.248 Mg/m <sup>3</sup>                                         |
| Absorption coefficient            | 0.098 mm <sup>-1</sup>                                          |
| F(000)                            | 648                                                             |
| Crystal size                      | 0.42 x 0.12 x 0.04 mm <sup>3</sup>                              |
| Theta range for data collection   | 1.36 to 25.37°                                                  |
| Index ranges                      | -6 ≤ h ≤ 6, -12 ≤ k ≤ 12, -36 ≤ l ≤ 35                          |
| Reflections collected             | 39657                                                           |
| Independent reflections           | 2968 [R(int) = 0.0293]                                          |
| Completeness to theta = 25.37°    | 100.0 %                                                         |
| Absorption correction             | Semi-empirical from equivalents                                 |
| Max. and min. transmission        | 0.7452 and 0.7064                                               |
| Refinement method                 | Full-matrix least-squares on F <sup>2</sup>                     |
| Data / restraints / parameters    | 2968 / 0 / 197                                                  |
| Goodness-of-fit on F <sup>2</sup> | 1.093                                                           |
| Final R indices [I > 2σ(I)]       | R1 = 0.0252, wR2 = 0.0595                                       |
| R indices (all data)              | R1 = 0.0280, wR2 = 0.0607                                       |
| Absolute structure parameter      | 0.1(6)                                                          |
| Largest diff. peak and hole       | 0.158 and -0.171 e.Å <sup>-3</sup>                              |

**Table 2. Refined Positional Parameters for Compound 7**

| Atom | x           | y            | z          | $U_{eq}, \text{\AA}^2$ |
|------|-------------|--------------|------------|------------------------|
| C1   | 0.8389(3)   | 0.17852(14)  | 0.03725(5) | 0.0253(3)              |
| C2   | 0.8234(3)   | 0.25457(13)  | 0.07943(4) | 0.0189(3)              |
| C3   | 0.5620(2)   | 0.24979(12)  | 0.09902(4) | 0.0161(3)              |
| C4   | 0.5289(2)   | 0.33879(12)  | 0.14036(4) | 0.0147(3)              |
| C5   | 0.6919(2)   | 0.29757(12)  | 0.17968(4) | 0.0138(3)              |
| C6   | 0.3740(2)   | 0.55286(12)  | 0.11597(4) | 0.0153(3)              |
| C7   | 0.2806(2)   | 0.77500(13)  | 0.08729(4) | 0.0167(3)              |
| C8   | 0.1391(3)   | 0.72289(14)  | 0.04704(4) | 0.0228(3)              |
| C9   | 0.4565(3)   | 0.88653(13)  | 0.07365(5) | 0.0239(3)              |
| C10  | 0.1086(3)   | 0.82034(14)  | 0.12436(4) | 0.0223(3)              |
| C11  | 0.7944(2)   | 0.09957(13)  | 0.22433(4) | 0.0152(3)              |
| C12  | 1.0732(2)   | 0.10867(14)  | 0.21520(5) | 0.0186(3)              |
| C13  | 0.7059(3)   | -0.04328(13) | 0.21971(5) | 0.0193(3)              |
| C14  | 0.7266(3)   | 0.15624(14)  | 0.26953(4) | 0.0207(3)              |
| N1   | 0.8506(3)   | 0.11896(14)  | 0.00507(4) | 0.0414(4)              |
| N2   | 0.5687(2)   | 0.47709(10)  | 0.12976(3) | 0.0159(2)              |
| O1   | 0.15768(17) | 0.51509(9)   | 0.11433(3) | 0.0184(2)              |
| O2   | 0.45668(16) | 0.67453(8)   | 0.10467(3) | 0.01736(19)            |
| O3   | 0.83022(18) | 0.37186(9)   | 0.19927(3) | 0.0200(2)              |
| O4   | 0.65151(16) | 0.16966(8)   | 0.18879(3) | 0.01432(19)            |
| F1   | 0.99360(14) | 0.19537(8)   | 0.10882(3) | 0.02547(19)            |

$U_{eq} = 1/3[U_{11}(aa^*)^2 + U_{22}(bb^*)^2 + U_{33}(cc^*)^2 + 2U_{12}aa^*bb^*\cos\gamma + 2U_{13}aa^*cc^*\cos\beta + 2U_{23}bb^*cc^*\cos\alpha]$

**Table 3. Positional Parameters for Hydrogens in Compound 7**

| Atom | x       | y      | z      | $U_{iso}, \text{\AA}^2$ |
|------|---------|--------|--------|-------------------------|
| H2   | 0.8719  | 0.3472 | 0.0741 | 0.025                   |
| H3a  | 0.5233  | 0.1587 | 0.1071 | 0.021                   |
| H3b  | 0.4427  | 0.2772 | 0.0764 | 0.021                   |
| H4   | 0.3539  | 0.3299 | 0.1499 | 0.020                   |
| H8a  | 0.2519  | 0.6740 | 0.0282 | 0.034                   |
| H8b  | 0.0700  | 0.7962 | 0.0307 | 0.034                   |
| H8c  | 0.0060  | 0.6655 | 0.0568 | 0.034                   |
| H9a  | 0.5520  | 0.9149 | 0.0990 | 0.036                   |
| H9b  | 0.3603  | 0.9600 | 0.0624 | 0.036                   |
| H9c  | 0.5682  | 0.8553 | 0.0509 | 0.036                   |
| H10a | -0.0029 | 0.7492 | 0.1323 | 0.033                   |
| H10b | 0.0126  | 0.8955 | 0.1145 | 0.033                   |

|      |        |         |        |       |
|------|--------|---------|--------|-------|
| H10c | 0.2069 | 0.8451  | 0.1499 | 0.033 |
| H12a | 1.1068 | 0.0793  | 0.1854 | 0.028 |
| H12b | 1.1623 | 0.0533  | 0.2359 | 0.028 |
| H12c | 1.1273 | 0.1992  | 0.2185 | 0.028 |
| H13a | 0.5283 | -0.0474 | 0.2248 | 0.029 |
| H13b | 0.7907 | -0.0978 | 0.2412 | 0.029 |
| H13c | 0.7429 | -0.0749 | 0.1903 | 0.029 |
| H14a | 0.7819 | 0.2469  | 0.2713 | 0.031 |
| H14b | 0.8068 | 0.1050  | 0.2925 | 0.031 |
| H14c | 0.5480 | 0.1527  | 0.2735 | 0.031 |
| H2a  | 0.7158 | 0.5113  | 0.1322 | 0.021 |

**Table 4. Refined Thermal Parameters (U's) for Compound 7**

| Atom | U <sub>11</sub> | U <sub>22</sub> | U <sub>33</sub> | U <sub>23</sub> | U <sub>13</sub> | U <sub>12</sub> |
|------|-----------------|-----------------|-----------------|-----------------|-----------------|-----------------|
| C1   | 0.0280(7)       | 0.0239(7)       | 0.0241(7)       | 0.0019(6)       | 0.0073(6)       | -0.0045(7)      |
| C2   | 0.0211(7)       | 0.0181(6)       | 0.0176(6)       | 0.0006(5)       | 0.0007(6)       | -0.0007(6)      |
| C3   | 0.0169(6)       | 0.0159(6)       | 0.0155(6)       | 0.0014(5)       | -0.0032(5)      | -0.0008(5)      |
| C4   | 0.0141(6)       | 0.0131(6)       | 0.0169(6)       | 0.0016(5)       | 0.0001(5)       | 0.0005(5)       |
| C5   | 0.0125(6)       | 0.0145(6)       | 0.0146(6)       | -0.0007(5)      | 0.0026(5)       | 0.0019(5)       |
| C6   | 0.0182(6)       | 0.0151(6)       | 0.0126(6)       | -0.0012(5)      | 0.0004(5)       | 0.0009(5)       |
| C7   | 0.0173(6)       | 0.0147(6)       | 0.0182(6)       | 0.0016(5)       | -0.0031(5)      | 0.0043(5)       |
| C8   | 0.0263(7)       | 0.0240(7)       | 0.0181(7)       | 0.0018(5)       | -0.0030(6)      | 0.0016(6)       |
| C9   | 0.0248(7)       | 0.0176(7)       | 0.0293(7)       | 0.0052(6)       | -0.0029(6)      | 0.0003(6)       |
| C10  | 0.0251(7)       | 0.0199(7)       | 0.0219(7)       | -0.0003(6)      | -0.0002(6)      | 0.0059(6)       |
| C11  | 0.0125(6)       | 0.0163(7)       | 0.0167(6)       | 0.0045(5)       | -0.0025(5)      | 0.0026(5)       |
| C12  | 0.0147(7)       | 0.0199(7)       | 0.0212(6)       | 0.0013(5)       | -0.0011(5)      | 0.0021(6)       |
| C13  | 0.0170(6)       | 0.0166(7)       | 0.0244(7)       | 0.0035(5)       | -0.0019(6)      | 0.0020(6)       |
| C14  | 0.0217(7)       | 0.0238(7)       | 0.0167(6)       | 0.0020(5)       | 0.0003(5)       | 0.0025(6)       |
| N1   | 0.0576(9)       | 0.0387(8)       | 0.0277(7)       | -0.0083(6)      | 0.0139(7)       | -0.0073(8)      |
| N2   | 0.0132(5)       | 0.0136(5)       | 0.0210(5)       | 0.0014(4)       | -0.0027(5)      | -0.0009(4)      |
| O1   | 0.0147(4)       | 0.0170(4)       | 0.0237(5)       | 0.0025(4)       | -0.0006(4)      | 0.0001(4)       |
| O2   | 0.0152(4)       | 0.0124(4)       | 0.0244(5)       | 0.0039(4)       | -0.0025(4)      | 0.0013(4)       |
| O3   | 0.0230(5)       | 0.0164(4)       | 0.0205(5)       | -0.0004(4)      | -0.0062(4)      | -0.0039(4)      |
| O4   | 0.0133(4)       | 0.0136(4)       | 0.0160(4)       | 0.0020(3)       | -0.0021(3)      | 0.0001(4)       |
| F1   | 0.0176(4)       | 0.0333(5)       | 0.0255(4)       | 0.0014(4)       | 0.0001(3)       | 0.0039(3)       |

The form of the anisotropic displacement parameter is:  
 $\exp[-2\pi^2(a^2U_{11}h^2+b^2U_{22}k^2+c^2U_{33}l^2+2b^*c^*U_{23}kl+2a^*c^*U_{13}hl+2a^*b^*U_{12}hk)]$

**Table 5. Bond Distances in Compound 7, Å**

|         |            |         |            |         |            |
|---------|------------|---------|------------|---------|------------|
| C1-N1   | 1.1381(19) | C1-C2   | 1.4812(19) | C2-F1   | 1.3985(15) |
| C2-C3   | 1.5135(18) | C3-C4   | 1.5398(17) | C4-N2   | 1.4425(16) |
| C4-C5   | 1.5229(17) | C5-O3   | 1.2034(15) | C5-O4   | 1.3327(15) |
| C6-O1   | 1.2152(16) | C6-O2   | 1.3442(15) | C6-N2   | 1.3526(16) |
| C7-O2   | 1.4746(15) | C7-C10  | 1.5122(18) | C7-C8   | 1.5175(18) |
| C7-C9   | 1.5182(19) | C11-O4  | 1.4881(14) | C11-C12 | 1.5144(18) |
| C11-C14 | 1.5154(18) | C11-C13 | 1.5185(18) |         |            |

**Table 6. Bond Angles in Compound 7, °**

|             |            |             |            |            |            |
|-------------|------------|-------------|------------|------------|------------|
| N1-C1-C2    | 179.33(15) | F1-C2-C1    | 106.44(11) | F1-C2-C3   | 109.81(10) |
| C1-C2-C3    | 111.52(11) | C2-C3-C4    | 113.58(10) | N2-C4-C5   | 110.46(10) |
| N2-C4-C3    | 111.48(10) | C5-C4-C3    | 113.61(10) | O3-C5-O4   | 126.72(11) |
| O3-C5-C4    | 124.01(11) | O4-C5-C4    | 109.26(10) | O1-C6-O2   | 125.86(12) |
| O1-C6-N2    | 124.37(12) | O2-C6-N2    | 109.78(10) | O2-C7-C10  | 109.42(10) |
| O2-C7-C8    | 111.18(10) | C10-C7-C8   | 112.84(11) | O2-C7-C9   | 102.04(10) |
| C10-C7-C9   | 110.49(11) | C8-C7-C9    | 110.34(11) | O4-C11-C12 | 110.14(10) |
| O4-C11-C14  | 109.95(10) | C12-C11-C14 | 111.93(11) | O4-C11-C13 | 102.94(10) |
| C12-C11-C13 | 110.22(11) | C14-C11-C13 | 111.31(11) | C6-N2-C4   | 119.87(11) |
| C6-O2-C7    | 120.28(10) | C5-O4-C11   | 121.45(9)  |            |            |



## 4. Reference

---

<sup>i</sup>Bruker (2009) SAINT. Bruker AXS Inc., Madison, Wisconsin, USA.

<sup>ii</sup>Bruker (2009) SHELXTL. Bruker AXS Inc., Madison, Wisconsin, USA.

<sup>iii</sup>Sheldrick, G.M. (2007) SADABS. University of Gottingen, Germany.

<sup>iv</sup>Sheldrick, G.M. (2008) Acta Cryst. A64,112-122.

<sup>v</sup>Sheldrick, G.M. (2008) Acta Cryst. A64,112-122.

$$R1 = \frac{\sum ||F_o| - |F_c||}{\sum |F_o|}$$

$$wR2 = [\sum w(F_o^2 - F_c^2)^2 / \sum w(F_o^2)^2]^{1/2}$$

$$GOF = [\sum w(F_o^2 - F_c^2)^2 / (n - p)]^{1/2}$$

where n = the number of reflections and p = the number of parameters refined.

<sup>vii</sup>“ORTEP-II: A Fortran Thermal Ellipsoid Plot Program for Crystal Structure Illustrations”. C.K. Johnson (1976) ORNL-5138.

<sup>viii</sup>Bruker (2009) SAINT. Bruker AXS Inc., Madison, Wisconsin, USA.

<sup>ix</sup>Bruker (2009) SHELXTL. Bruker AXS Inc., Madison, Wisconsin, USA.

<sup>x</sup>Sheldrick, G.M. (2007) SADABS. University of Gottingen, Germany.

<sup>xi</sup>Sheldrick, G.M. (2008) Acta Cryst. A64,112-122.

<sup>xii</sup>Sheldrick, G.M. (2008) Acta Cryst. A64,112-122.

$$R1 = \frac{\sum ||F_o| - |F_c||}{\sum |F_o|}$$

$$wR2 = [\sum w(F_o^2 - F_c^2)^2 / \sum w(F_o^2)^2]^{1/2}$$

$$GOF = [\sum w(F_o^2 - F_c^2)^2 / (n - p)]^{1/2}$$

where n = the number of reflections and p = the number of parameters refined.

<sup>xiv</sup>“ORTEP-II: A Fortran Thermal Ellipsoid Plot Program for Crystal Structure Illustrations”. C.K. Johnson (1976) ORNL-5138.
